# Supplementary material for: Resolving the Judgment and Decision-Making Paradox Between Adaptive Learning and Escalation of Commitment
Source: Atypon-hosted journal article supplement (doi:10.1287/mnsc.2016.2686), 2017-03-30
Supplement: mnsc.2016.2686-sm.pdf [file mnsc.2016.2686-sm.pdf]

## Supplementary Materials:

### Proof of the Logic by Mathematical Induction

Hit-and-go Formula

$$\text{Summed Utility} = \sum_{i=1}^q \frac{1}{i} \times [(1-p)^{(i-1)} \times p]$$

Miss-and-go Formula

$$\text{Summed Utility} = p^q + \sum_{i=1}^q \frac{i-1}{i} \times [p^{(i-1)} \times (1-p)]$$

Let S(n) be the statement that the summed utility for the hit-and-go formula is larger than the summed utility for the miss-and-go formula:

$$\sum_{i=1}^q \frac{1}{i} \times [(1-p)^{(i-1)} \times p] - \left\{ p^q + \sum_{i=1}^q \frac{i-1}{i} \times [p^{(i-1)} \times (1-p)] \right\} \geq 0$$

For  $q = 1$ , both the hit-and-go and miss-and-go formulas give a summed utility =  $p$ ; that is, S(1) is true.

If we assume S(k) to be true, that is,

$$\sum_{i=1}^k \frac{1}{i} \times [(1-p)^{(i-1)} \times p] - \left\{ p^k + \sum_{i=1}^k \frac{i-1}{i} \times [p^{(i-1)} \times (1-p)] \right\} \geq 0$$

then

$$\sum_{i=1}^k \frac{1}{i} \times [(1-p)^{(i-1)} \times p] - \sum_{i=1}^k \frac{i-1}{i} \times [p^{(i-1)} \times (1-p)] - p^k \geq 0$$

$$\sum_{i=1}^k \frac{1}{i} \times [(1-p)^{(i-1)} \times p] - \sum_{i=1}^k \frac{i-1}{i} \times [p^{(i-1)} \times (1-p)] - p^k + p^{k+1} - p^{k+1} \geq 0$$

$$\sum_{i=1}^k \frac{1}{i} \times [(1-p)^{(i-1)} \times p] - \sum_{i=1}^k \frac{i-1}{i} \times [p^{(i-1)} \times (1-p)] - p^k(1-p) - p^{k+1} \geq 0$$

$$\sum_{i=1}^k \frac{1}{i} \times [(1-p)^{(i-1)} \times p] - \sum_{i=1}^k \frac{i-1}{i} \times [p^{(i-1)} \times (1-p)] - \frac{k+1}{k+1} p^k(1-p) - p^{k+1} \geq 0$$

$$\sum_{i=1}^k \frac{1}{i} \times [(1-p)^{(i-1)} \times p] - \sum_{i=1}^k \frac{i-1}{i} \times [p^{(i-1)} \times (1-p)] - \frac{kp^k(1-p) + p^k(1-p)}{k+1} - p^{k+1} \geq 0$$

$$\sum_{i=1}^k \frac{1}{i} \times [(1-p)^{(i-1)} \times p] - \sum_{i=1}^k \frac{i-1}{i} \times [p^{(i-1)} \times (1-p)] - \frac{kp^k(1-p)}{k+1} - \frac{p^k(1-p)}{k+1} - p^{k+1} \geq 0$$

$$\sum_{i=1}^k \frac{1}{i} \times [(1-p)^{(i-1)} \times p] - \frac{p^k(1-p)}{k+1} - \sum_{i=1}^k \frac{i-1}{i} \times [p^{(i-1)} \times (1-p)] - \frac{kp^k(1-p)}{k+1} - p^{k+1} \geq 0$$

$$\sum_{i=1}^k \frac{1}{i} \times [(1-p)^{(i-1)} \times p] - \frac{p^k(1-p)}{k+1} - \sum_{i=1}^k \frac{i-1}{i} \times [p^{(i-1)} \times (1-p)] - \frac{kp^k(1-p)}{k+1} - p^{k+1} \geq 0$$

$$\sum_{i=1}^k \frac{1}{i} \times [(1-p)^{(i-1)} \times p] + \frac{p(1-p)^k}{k+1} - \frac{p(1-p)^k}{k+1} - \frac{p^k(1-p)}{k+1} - \sum_{i=1}^k \frac{i-1}{i} \times [p^{(i-1)} \times (1-p)] - \frac{kp^k(1-p)}{k+1} - p^{k+1} \geq 0$$

$$\sum_{i=1}^k \frac{1}{i} \times [(1-p)^{(i-1)} \times p] + \frac{p(1-p)^k}{k+1} - \sum_{i=1}^k \frac{i-1}{i} \times [p^{(i-1)} \times (1-p)] - \frac{kp^k(1-p)}{k+1} - p^{k+1} - \frac{p(1-p)^k}{k+1} - \frac{p^k(1-p)}{k+1} \geq 0$$

$$\sum_{i=1}^{k+1} \frac{1}{i} \times [(1-p)^{(i-1)} \times p] - \sum_{i=1}^{k+1} \frac{i-1}{i} \times [p^{(i-1)} \times (1-p)] - p^{k+1} - \frac{p(1-p)^k}{k+1} - \frac{p^k(1-p)}{k+1} \geq 0$$

$$\sum_{i=1}^{k+1} \frac{1}{i} \times [(1-p)^{(i-1)} \times p] - \sum_{i=1}^{k+1} \frac{i-1}{i} \times [p^{(i-1)} \times (1-p)] - p^{k+1} - \frac{p(1-p)}{k+1} [(1-p)^{k-1} + p^{k-1}] \geq 0$$

$$\sum_{i=1}^{k+1} \frac{1}{i} \times [(1-p)^{(i-1)} \times p] - \sum_{i=1}^{k+1} \frac{i-1}{i} \times [p^{(i-1)} \times (1-p)] - p^{k+1} \geq 0 \because \frac{p(1-p)}{k+1} [(1-p)^{k-1} + p^{k-1}] \geq 0$$

Therefore, H(k+1) is also true.

By mathematical induction, H(q) is true for all integers  $q \geq 1$ .
